# Supplementary material
Source: MDPI journal article supplement (https://www.mdpi.com/2297-8739/7/1/19)
Supplement: s1 [file s1]

## Supplementary Materials

# Mixed Matrix Membrane Tip Extraction Coupled With UPLC-MS/MS for the Monitoring of Nonsteroidal Anti-Inflammatory Drugs in Water Samples

Thipashini Ganesan <sup>1,2</sup>, Nurul Hazirah Mukhtar <sup>1,2</sup>, Hong Ngee Lim <sup>3</sup> and Hong Heng See <sup>1,2,\*</sup>

<sup>1</sup> Centre for Sustainable Nanomaterials, Ibnu Sina Institute for Scientific and Industrial Research, Universiti Teknologi Malaysia, 81310 UTM Johor Bahru, Johor, Malaysia.

<sup>2</sup> Department of Chemistry, Faculty of Science, Universiti Teknologi Malaysia, 81310 UTM Johor Bahru, Johor, Malaysia

<sup>3</sup> Department of Chemistry, Faculty of Science, Universiti Putra Malaysia, 43400 Serdang, Selangor, Malaysia.

\* Correspondence: hhsee@utm.my

### Contents:

Figure S1. Effect of sample pH on peak responses using mixed matrix membrane tip microextraction. Extraction parameters: addition of salt, 2% (w/v); sample volume, 10 mL; desorption solvent volume, 40  $\mu$ L; analyte concentration, 100 ng L<sup>-1</sup> of spiked solution. (Error bars represent standard deviations of results,  $n = 3$ ).

Figure S2. Effect of addition of salt on peak responses using mixed matrix membrane tip microextraction. Extraction parameters: sample pH 3.5; sample volume, 10 mL; desorption solvent volume, 40  $\mu$ L; analyte concentration, 100 ng L<sup>-1</sup> of spiked solution. (Error bars represent standard deviations of results,  $n = 3$ ).

Table S1. Comparison of the current work with other previous methods for analysis of NSAIDs.

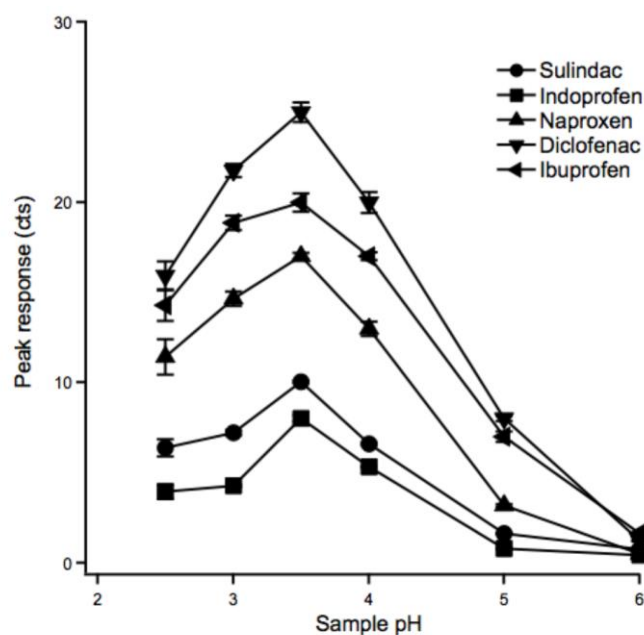

**Figure S1.** Effect of sample pH on peak responses using mixed matrix membrane tip microextraction. Extraction parameters: addition of salt, 2% (w/v); sample volume, 10 mL; desorption solvent volume, 40  $\mu$ L; analyte concentration, 100 ng L<sup>-1</sup> of spiked solution. (Error bars represent standard deviations of results,  $n = 3$ ).

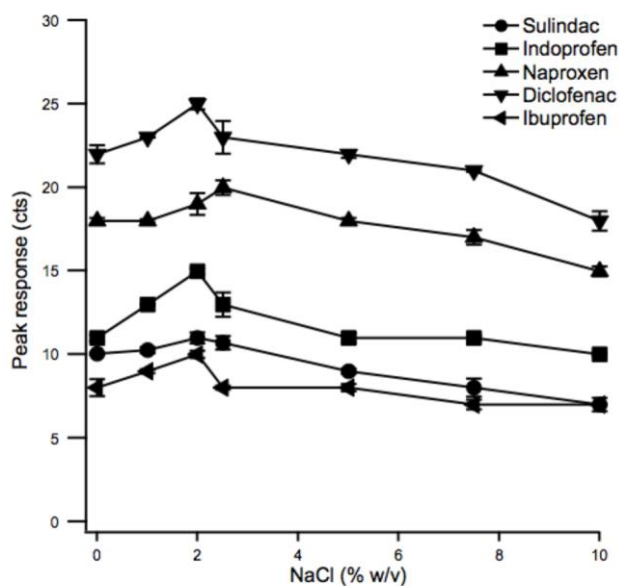

**Figure S2.** Effect of addition of salt on peak responses using mixed matrix membrane tip microextraction. Extraction parameters: sample pH 3.5; sample volume, 10 mL; desorption solvent volume, 40  $\mu$ L; analyte concentration, 100 ng L<sup>-1</sup> of spiked solution. (Error bars represent standard deviations of results,  $n = 3$ ).

**Table S1:** Comparison of the current work with other previous methods for analysis of NSAIDs.

| Materials                                        | Analytical Method                               | Matrix                 | Target Analytes                                                                      | Extraction Time | Desorption Volume (μL) | LODs (ng L <sup>-1</sup> ) | EF        | Ref.              |
|--------------------------------------------------|-------------------------------------------------|------------------------|--------------------------------------------------------------------------------------|-----------------|------------------------|----------------------------|-----------|-------------------|
| C <sub>18</sub>                                  | MPSBSE <sup>a</sup> -HPLC-UV                    | Wastewater             | Ketoprofen and naproxen                                                              | 60 min          | 150                    | 7890 and 9520              | 32.0–49.1 | [1]               |
| Magnetic graphene/F <sub>e</sub> 3O <sub>4</sub> | MSPE <sup>b</sup> -UHPLC-PDA                    | Human plasma and urine | Furprofen, diclofenac, ketoprofen, flurbiprofen, naproxen and fenbufen and ibuprofen | 2 min           | 500                    | 610 - 1200                 | -         | [2]               |
| MS-CNP <sub>r</sub> TEOS) <sup>c</sup>           | D-μ-SPE <sup>d</sup> -HPLC-UV                   | Water samples          | ketoprofen, ibuprofen, diclofenac and mefenamic acid                                 | 5 min           | 250                    | 210 - 510                  | 42–55     | [3]               |
| Sol-gel                                          | FPSE-GC-MS <sup>e</sup>                         | Water Samples          | Ibuprofen naproxen, ketoprofen and diclofenac                                        | 120 min         | 50                     | 0.8 - 5                    | 162–418   | [4]               |
| C <sub>18</sub>                                  | MMM-HPLC-UV <sup>f</sup>                        | River water            | Diclofenac, mefenamic acid and ibuprofen                                             | 20 min          | 100                    | 160 – 220                  | 79–83     | Previous work [5] |
| C <sub>18</sub>                                  | MMMTE <sup>b</sup> -UPLC-MS/<br>MS <sup>g</sup> | Sewage water           | Indoprofen, sulindac, naproxen, diclofenac, and ibuprofen                            | 10 min          | 40                     | 0.08-0.40                  | 201–249   | Current work      |

<sup>a</sup>Membrane protected stir bar sorptive extraction

<sup>b</sup>Dispersive magnetic solid phase extraction

<sup>c</sup>Magnetic sporopollenin-cyanopropyltriethoxysilane-dispersive

<sup>d</sup>Micro-solid phase extraction

<sup>e</sup>Fabric phase sorptive extraction

<sup>f</sup>MMME – mixed matrix membrane extraction

<sup>g</sup>MMMTE – mixed matrix membrane tip extraction

## References:

1. Mao, X.; He, M.; Chen, B.; Hu, B. Membrane protected C<sub>18</sub> coated stir bar sorptive extraction combined with high performance liquid chromatography-ultraviolet detection for the determination of non-steroidal anti-inflammatory drugs in water samples. *J. Chromatogr. A*, **2016**, 1472, 27–34.
2. Ferrone, V.; Carlucci, M.; Ettorre, V.; Cotellesse, R.; Palumbo, P.; Fontana, A.; Siani, G.; Carlucci, G. Dispersive magnetic solid phase extraction exploiting magnetic graphene nanocomposite coupled with UHPLC-PDA for simultaneous determination of NSAIDs in human plasma and urine. *J. Pharmaceut. Biomed. Anal.*, **2018**, 161, 280–288.
3. Abd Wahib, S.M.; Wan Ibrahim, W.A.; Sanagi, M.M.; Kamboh, M.A.; Abdul Keyon, A.S. Magnetic sporopollenin-cyanopropyltriethoxysilane-dispersive micro-solid phase extraction coupled with high performance liquid chromatography for the determination of selected non-steroidal anti-inflammatory drugs in water samples. *J. Chromatogr. A*, **2018**, 1532, 50–57.
4. Racamonde, I.; Rodil, R.; Quintana, J.B.; Sieira, B.J.; Kabir, A.; Furton, K.G.; Cela, R. Fabric phase sorptive extraction: A new sorptive microextraction technique for the determination of non-steroidal anti-inflammatory drugs from environmental water samples. *Anal. Chim. Acta*, **2015**, 865, 22–30.
5. Kamaruzaman, S.; Hauser, P.C.; Sanagi, M.M.; Ibrahim, W.A.W.; Endud, S. and See, H.H. A simple microextraction and preconcentration approach based on a mixed matrix membrane. *Anal. Chim. Acta*, **2013**, 783, 24–30.
